# Supplementary material for: Chronic Pain and Its Association with Depressive Symptoms and Renal Function in Hypertensive Patients
Source: MDPI journal article supplement (doi:10.3390/ijerph19031899), 2022-02-08
Supplement: s1 [file s1]

## Contents

|                            |   |
|----------------------------|---|
| Supplementary Table 1..... | 2 |
| Supplementary Table 2..... | 3 |
| Supplementary Table 3..... | 4 |

Supplementary Table 1

| <b>Baseline hematologic, biochemical, inflammatory, and lipid markers of the study population.</b> |                               |                                        |                                      |          |
|----------------------------------------------------------------------------------------------------|-------------------------------|----------------------------------------|--------------------------------------|----------|
| <b>Parameters</b>                                                                                  | <b>Total Patients (N=158)</b> | <b>Patients with eGFR&lt;60 (N=47)</b> | <b>Patients with eGFR≥60 (N=111)</b> | <b>p</b> |
| Ht, %                                                                                              | 41.8 (SD: 4.0)                | 41.3 (SD: 4.4)                         | 41.9 (SD: 3.9)                       | .52      |
| Hb, g/dl                                                                                           | 14.0 (SD: 1.5)                | 13.9 (SD: 1.7)                         | 14.0 (SD: 1.5)                       | .71      |
| Glucose, mg/dl                                                                                     | 104 (SD: 29)                  | 116 (SD: 45)                           | 99 (SD: 17)                          | .001     |
| Urea, mg/dl                                                                                        | 45 (SD: 25)                   | 61 (SD: 29)                            | 38 (SD: 21)                          | <.001    |
| Creatinine, mg/dl                                                                                  | 1.23 (SD: 0.87)               | 1.70 (SD: 0.61)                        | 1.03 (SD: 0.89)                      | <.001    |
| eGFR <sub>CKD-EPI</sub> , ml/min/1.73m <sup>2</sup>                                                | 70.4 (SD: 22.1)               | 42.9 (SD: 11.0)                        | 82.1 (SD: 13.7)                      | <.001    |
| Total cholesterol, mg/dl                                                                           | 204 (SD: 40)                  | 193 (SD: 41)                           | 208 (SD: 39)                         | .09      |
| Triglycerides, mg/dl                                                                               | 126 (SD: 57)                  | 130 (SD: 70)                           | 125 (SD: 53)                         | .68      |
| High density lipoprotein cholesterol, mg/dl                                                        | 57 (SD: 16)                   | 54 (SD: 18)                            | 58 (SD: 15)                          | .24      |
| Low density lipoprotein, mg/dl                                                                     | 122 (SD: 35)                  | 113 (SD: 34)                           | 125 (SD: 34)                         | .15      |
| Serum albumin, g/dl                                                                                | 4.3 (SD: 0.7)                 | 4.2 (SD: 0.6)                          | 4.3 (SD: 0.7)                        | .41      |
| C-reactive protein, mg/l                                                                           | 6.2 (SD: 2.1)                 | 7.0 (SD: 3.0)                          | 6.0 (SD: 2.6)                        | .84      |
| Fibrinogen, mg/dl                                                                                  | 360 (SD:112)                  | 372 (SD: 173)                          | 356 (SD: 86)                         | .67      |
| SD: standard deviation, Ht: hematocrit, Hb: hemoglobin, eGFR: estimated glomerular filtration rate |                               |                                        |                                      |          |

Supplementary Table 2

| <b>Supplementary table 2. Laboratory characteristics of the study population stratified by the presence of self-reported chronic pain.</b> |                                          |                                             |          |
|--------------------------------------------------------------------------------------------------------------------------------------------|------------------------------------------|---------------------------------------------|----------|
| <b>Parameters</b>                                                                                                                          | <b>Self-reported chronic pain (N=70)</b> | <b>No self-reported chronic pain (N=88)</b> | <b>p</b> |
| Ht, %                                                                                                                                      | 41.1 (SD: 3.6)                           | 42.3 (SD: 4.2)                              | .08      |
| Hb, g/dl                                                                                                                                   | 13.6 (SD: 1.3)                           | 14.3 (SD: 1.7)                              | .02      |
| Glucose, mg/dl                                                                                                                             | 107 (SD: 35)                             | 102 (SD: 23)                                | .29      |
| Urea, mg/dl                                                                                                                                | 46 (SD: 23)                              | 44 (SD: 27)                                 | .64      |
| Creatinine, mg/dl                                                                                                                          | 1.16 (SD: 0.51)                          | 1.28 (SD: 1.09)                             | .37      |
| eGFR <sub>CKD-EPI</sub> , ml/min/1.73m <sup>2</sup>                                                                                        | 67.0 (SD: 21.8)                          | 73.1 (SD: 22.1)                             | .09      |
| Total cholesterol, mg/dl                                                                                                                   | 208 (SD: 47)                             | 201 (SD: 34)                                | .37      |
| Triglycerides, mg/dl                                                                                                                       | 131 (SD: 67)                             | 122 (SD: 48)                                | .47      |
| High density lipoprotein cholesterol, mg/dl                                                                                                | 58 (SD: 17)                              | 56 (SD: 15)                                 | .59      |
| Low density lipoprotein, mg/dl                                                                                                             | 124 (SD: 40)                             | 120 (SD: 31)                                | .57      |
| Serum albumin, g/dl                                                                                                                        | 4.2 (SD: 0.7)                            | 4.4 (SD: 0.7)                               | .20      |
| C-reactive protein, mg/l                                                                                                                   | 4.7 (SD: 1.5)                            | 7.7 (SD: 3.8)                               | .47      |
| Fibrinogen, mg/dl                                                                                                                          | 334 (SD: 72)                             | 376 (SD: 129)                               | .23      |
| SD: standard deviation, Ht: hematocrit, Hb: hemoglobin, eGFR: estimated glomerular filtration rate                                         |                                          |                                             |          |

Supplementary Table 3

| <b>Supplementary Table 3: Clinical, psychometric, and laboratory characteristics of patients with impaired renal function (eGFR&lt;60ml/min/1.73m<sup>2</sup>) stratified by self-reported chronic pain.</b> |                                      |                                         |          |
|--------------------------------------------------------------------------------------------------------------------------------------------------------------------------------------------------------------|--------------------------------------|-----------------------------------------|----------|
| <b>Parameters</b>                                                                                                                                                                                            | <b>Self-reported pain<br/>(N=23)</b> | <b>No self-reported pain<br/>(N=24)</b> | <b>p</b> |
| <b>Clinical characteristics</b>                                                                                                                                                                              |                                      |                                         |          |
| Age, years                                                                                                                                                                                                   | 63.4 (SD: 12.1)                      | 53.3 (SD: 13.9)                         | .01      |
| Male Sex                                                                                                                                                                                                     | 9 (39.1%)                            | 18 (75.0%)                              | .01      |
| BMI, kg/m <sup>2</sup>                                                                                                                                                                                       | 28.4 (SD: 3.7)                       | 27.9 (SD: 4.1)                          | .74      |
| Obesity                                                                                                                                                                                                      | 5 (29.4%)                            | 6 (33.3%)                               | .80      |
| Diabetes mellitus                                                                                                                                                                                            | 6 (28.6%)                            | 2 (10.0%)                               | .13      |
| Cardiovascular disease                                                                                                                                                                                       | 0                                    | 4 (20.0%)                               | .03      |
| <b>Psychometric characteristics</b>                                                                                                                                                                          |                                      |                                         |          |
| Depression (PHQ-9)                                                                                                                                                                                           | 9.1 (SD: 5.7)                        | 4.0 (SD: 3.0)                           | <.001    |
| PHQ-9 above 75 <sup>th</sup> percentile                                                                                                                                                                      | 12 (50.0%)                           | 3 (13.0%)                               | .007     |
| <b>Laboratory measurements</b>                                                                                                                                                                               |                                      |                                         |          |
| Ht, %                                                                                                                                                                                                        | 40.0 (SD: 4.0)                       | 42.6 (SD: 4.5)                          | .10      |
| Hb, g/dl                                                                                                                                                                                                     | 13.3 (SD: 1.4)                       | 14.5 (SD: 1.8)                          | .05      |
| Glucose, mg/dl                                                                                                                                                                                               | 119 (SD: 51)                         | 113 (SD: 38)                            | .66      |
| Total cholesterol, mg/dl                                                                                                                                                                                     | 206 (SD: 55)                         | 183 (SD: 25)                            | .16      |
| Triglycerides, mg/dl                                                                                                                                                                                         | 141 (SD: 100)                        | 123 (SD: 39)                            | .53      |
| High density lipoprotein cholesterol, mg/dl                                                                                                                                                                  | 56 (SD: 23)                          | 52 (SD: 13)                             | .51      |
| Low density lipoprotein, mg/dl                                                                                                                                                                               | 122 (SD: 45)                         | 107 (SD: 24)                            | .29      |
| Serum albumin, g/dl                                                                                                                                                                                          | 3.9 (SD: 0.7)                        | 4.4 (SD: 0.4)                           | .02      |
| C-reactive protein, mg/l                                                                                                                                                                                     | 9.8 (SD: 6.5)                        | 4.7 (SD: 1.8)                           | .43      |
| Fibrinogen, mg/dl                                                                                                                                                                                            | 298 (SD: 43)                         | 415 (SD: 207)                           | .30      |
| ST: standard deviation, eGFR: estimated glomerular filtration rate, BMI: body mass index, PHQ-9: patient health questionnaire-9, Ht: hematocrit, Hb: hemoglobin                                              |                                      |                                         |          |
